# Supplementary material
Source: PubMed Central journal article supplement (PMC9121415)
Supplement: bcr-2021-246176supp001.pdf [file bcr-2021-246176supp001.pdf]

## Supplemental Materials

### Appendix 1 – Search strategy

To identify previous cases of angioimmunoblastic T-cell lymphoma (AITL) coincident with Guillain-Barré syndromes (GBS), we searched OVID MEDLINE from 1946 to May 26, 2020 using the following search strategy. Only articles either describing individual case reports, case series, or larger epidemiologic studies (e.g. randomized controlled trials, cohort studies, case-control studies, or cross-sectional studies) were eligible for inclusion. No restrictions were placed in terms of language. After applying the below search criteria, 4 cases of AITL with GBS were identified in addition to ours [1–4], including one presenting with Miller Fisher syndrome [4]. We further identified an additional case by a review of previously published literature in this area, which was mentioned in the context of a cohort study, but which was not described individually [5].

1. exp Immunoblastic Lymphadenopathy/
2. (Angioimmunoblastic adj T-cell adj Lymphoma).mp
3. (angioimmunoblastic adj lymphadenopathy adj with adj dysproteinemia).mp
4. (immunoblastic adj lymphadenopathy).mp
5. (lymphogranulomatosis adj X).mp
6. 1 or 2 or 3 or 4 or 5 [\*\*\*AITL Set\*\*\*]
7. exp guillain-barre syndrome/ or exp miller fisher syndrome/
8. (Guillain adj Barre).mp
9. Guillain-barre.mp
10. (acute adj inflammatory adj demyelinating adj polyneuropathy).mp

11. (acute adj motor adj axonal adj neuropathy).mp
12. (Acute adj motor adj sensory adj axonal adj neuropathy).mp
13. (Miller adj Fisher).mp.
14. (Fisher\* adj syndrome).mp
15. 7 or 8 or 9 or 10 or 11 or 12 or 13 or 14 [\*\*\*GBS Set\*\*\*]
16. 6 and 15 [\*\*\*Final Set\*\*\*]

### References

- 1 Pathak P, Perimbeti S, Ames A, *et al.* Guillain Barre syndrome heralding the diagnosis of angioimmunoblastic T-cell lymphoma. *Leuk Lymphoma* 2019;**60**:1835–8.
- 2 Naidech A, Weisberg L, Palliyath S, *et al.* Sudden weakness in a patient with lymphoma. *Cleve Clin J Med* 2002;**69**:337–41.
- 3 Lindahl J, Kimby E, Björkstrand B, *et al.* High-dose chemotherapy and APSCT as a potential cure for relapsing hemolysing AILD. *Leuk Res* 2001;**25**:267–70.
- 4 Monteiro MLR, Coppeto JR, Greco P, *et al.* Angioimmunoblastic lymphadenopathy with Fisher syndrome. *Arch Neurol* 1984;**41**:456–7.
- 5 Hiew FL, Rajabally YA. Malignancy in Guillain-Barré syndrome: A twelve-year single-center study. *J Neurol Sci* 2017;**375**:275–8.
